# Supplementary figures and images for: Portable Surface Plasmon Resonance Detector for COVID-19 Infection
Source: MDPI journal article supplement (doi:10.3390/s23083946), 2023-04-13

# Control channel drift over time

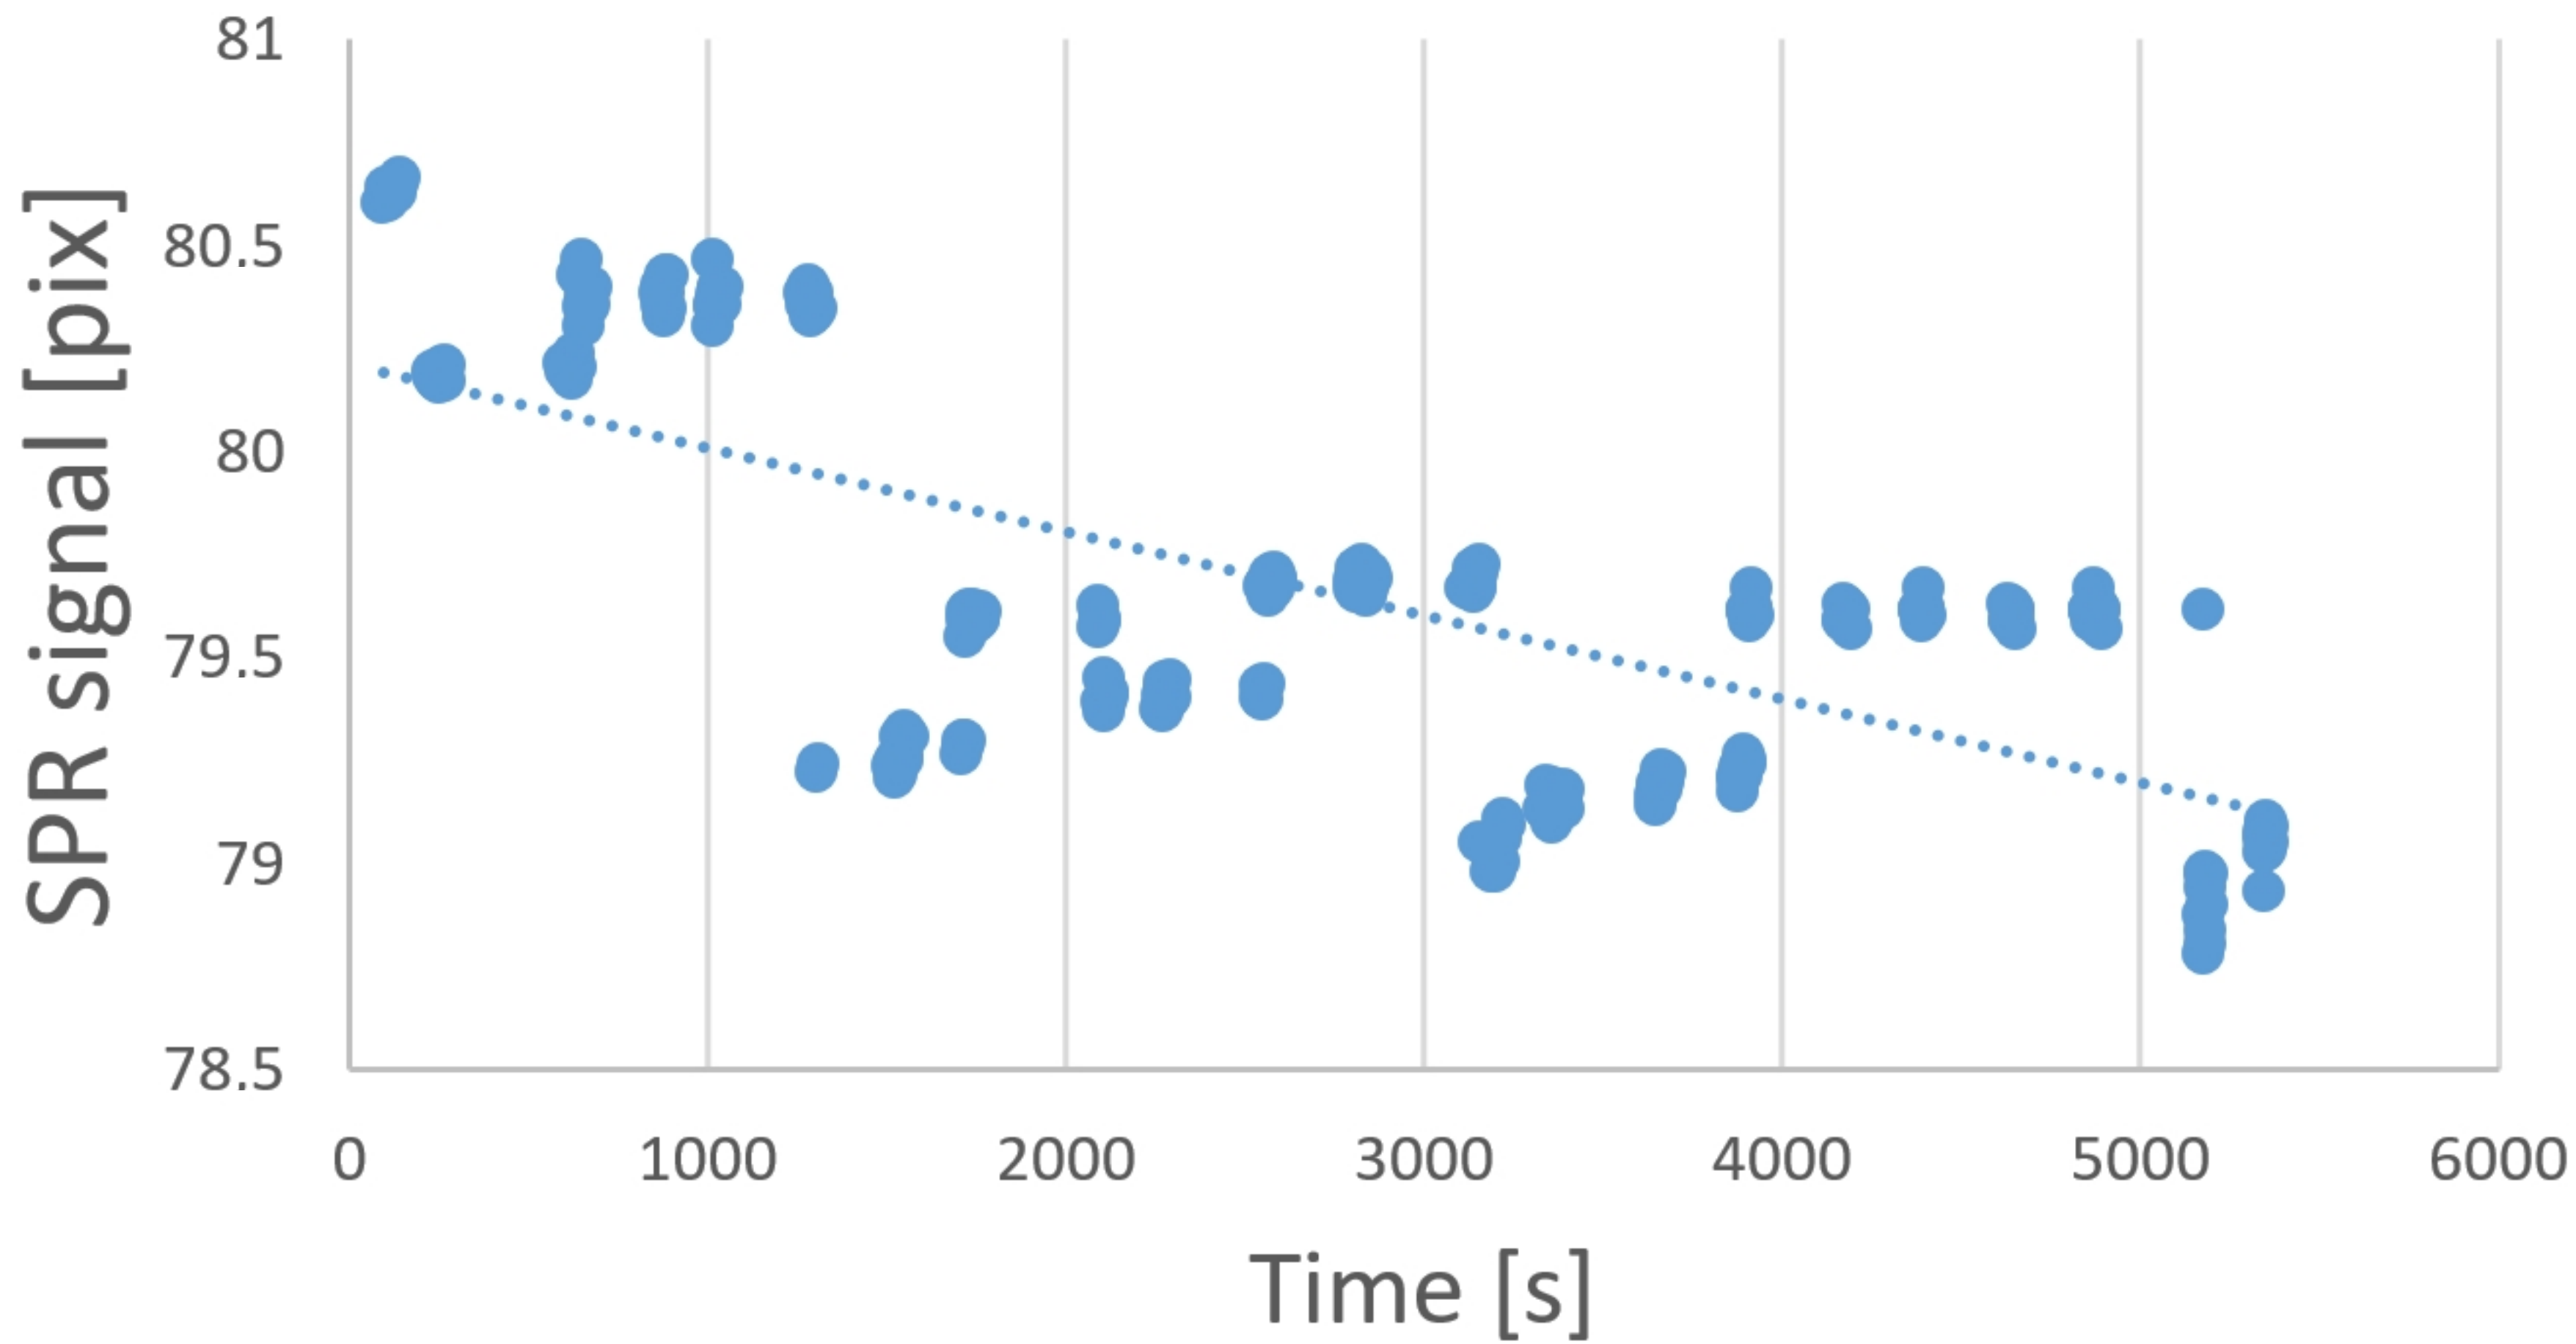

Supplement: s1 [file s1]
